# Supplementary material
Source: PubMed Central journal article supplement (PMC3039375)
Supplement: supp_M110.147512_jbc.M110.147512-1.pdf [file supp_M110.147512_jbc.M110.147512-1.pdf]

Supporting Table 1. Primers used for mutagenesis

|                |                                                                                    |
|----------------|------------------------------------------------------------------------------------|
| <b>AAA-WT</b>  | 5'-CAT CAT TAA <u>CTG CTT</u> <u>CCG CTC</u> CAA <u>CAG CTC</u> AAG ACC AAA AAC-3' |
| <b>ASS-WT</b>  | 5'-CAT CAT TAA <u>CTG CTT</u> CCT CAC CAA CAA GTC AAG ACC AAA AAC-3'               |
| <b>SSA-WT</b>  | 5'-CAT CAT TAA CTT CTT CCT CAC CAA <u>CAG CTC</u> AAG ACC AAA AAC-3'               |
| <b>SAS-WT</b>  | 5'-CAT CAT TAA CTT CTT <u>CCG CTC</u> CAA CAA GTC AAG ACC AAA AAC-3'               |
| <b>DDD-WT</b>  | 5'-CAT CAT TAA <u>CTG ATT</u> <u>CCG ATC</u> CAA <u>CAG ATC</u> AAG ACC AAA AAC-3' |
| <b>SDS-WT</b>  | 5'-CAT CAT TAA CTT CTT <u>CCG ATC</u> CAA CAA GTC AAG ACC AAA AAC-3'               |
| <b>DSS-WT</b>  | 5'-CAT CAT TAA <u>CTG ATT</u> CCT CAC CAA CAA GTC AAG ACC AAA AAC-3'               |
| <b>SSD-WT</b>  | 5'-CAT CAT TAA CTT CTT CCT CAC CAA <u>CAG ATC</u> AAG ACC AAA AAC-3'               |
| <b>WT-AAA</b>  | 5'-GGC CAA TCA <u>GCA</u> GCT GCA <u>GCA GCT</u> CCT GAT CG-3'                     |
| <b>WT-DDD</b>  | 5'-GGC CAA TCA <u>GAT</u> GCT GCA <u>GAT GAT</u> CCT GAT CG-3'                     |
| <b>AAA-DDD</b> | 5'-CAT CAT TAA <u>CTG CTT</u> <u>CCG CTC</u> CAA <u>CAG CTC</u> AAG ACC AAA AAC-3' |
|                | 5'-GGC CAA TCA <u>GAT</u> GCT GCA <u>GAT GAT</u> CCT GAT CG-3'                     |
| <b>DDD-AAA</b> | 5'-GGC CAA TCA <u>GCA</u> GCT GCA <u>GCA GCT</u> CCT GAT CG-3'                     |
|                | 5'-CAT CAT TAA <u>CTG ATT</u> <u>CCG ATC</u> CAA <u>CAG ATC</u> AAG ACC AAA AAC-3' |

*Oligonucleotide primers (Forward)*

Mutated residues are underlined
