# Supplementary material
Source: PubMed Central journal article supplement (PMC3039375)
Supplement: supp_M110.147512_jbc.M110.147512-2.pdf [file supp_M110.147512_jbc.M110.147512-2.pdf]

## Supporting Table 2 NetPhos Scores

### Serine predictions

| Name          | Pos        | Context<br>*       | Score |
|---------------|------------|--------------------|-------|
| LePRK2        | 273        | VLGGSSLT*          | 0.006 |
| LePRK2        | 274        | LGGSSLTSS          | 0.095 |
| <b>LePRK2</b> | <b>277</b> | SSLT <b>S</b> SSPT | 0.967 |
| LePRK2        | 278        | SLTSSSP*           | 0.054 |
| <b>LePRK2</b> | <b>279</b> | LTSSSP*            | 0.993 |
| <b>LePRK2</b> | <b>282</b> | SSPT <b>S</b> QDQK | 0.963 |
| LePRK2        | 291        | LIPQSHDHL          | 0.023 |
| LePRK2        | 303        | EQGQSSAAS          | 0.068 |
| <b>LePRK2</b> | <b>304</b> | QGQSSAAS*          | 0.848 |
| <b>LePRK2</b> | <b>307</b> | SSAAS <b>T</b> PD* | 0.983 |
| LePRK2        | 346        | LLKASAEVL          | 0.432 |

### Threonine predictions

| Name          | Pos        | Context<br>*       | Score |
|---------------|------------|--------------------|-------|
| LePRK2        | 276        | GSSLTSSSP          | 0.176 |
| LePRK2        | 281        | SSSP <b>T</b> SQDQ | 0.045 |
| <b>LePRK2</b> | <b>308</b> | SAAS <b>T</b> PDRA | 0.974 |

Score goes from 0-1. Bold shows selected residues for analysis. Asterisks indicate the position of the residue analyzed
